# Supplementary material for: Four new dual-functional electro-catalysts formed from small molybdenum clusters and Cu-pyridyl complexes
Source: Royal Society of Chemistry journal article supplement (doi:10.1039/c9dt03560e), 2019-01-01
Supplement: c9dt03560e1.pdf [file c9dt03560e1.pdf]

## Four new dual-functional electro-catalysts formed of small molybdenum clusters and Cu-pyridyl complexes

Wanli Zhou,<sup>\*a</sup> Ping Liu,<sup>a</sup> Yanping Zheng,<sup>a</sup> Xuekun Liu,<sup>a</sup> Yong Zhang,<sup>a</sup> Gang Yuan,<sup>a</sup> Jun Peng<sup>\*b</sup>

<sup>a</sup> Faculty of Chemistry, Tonghua Normal University, Tonghua, Jilin 134002, PR China

<sup>b</sup> Key Laboratory of Polyoxometalate Science of Ministry of Education, Faculty of Chemistry, Northeast Normal University, Changchun, Jilin 130024, PR China

### Electronic Supplementary Information

**Table S1** X-ray crystallographic data for compounds **1-4**

| Compound              | <b>1</b>                                                                                                | <b>2</b>                                                                                          | <b>3</b>                                                                             | <b>4</b>                                                                            |
|-----------------------|---------------------------------------------------------------------------------------------------------|---------------------------------------------------------------------------------------------------|--------------------------------------------------------------------------------------|-------------------------------------------------------------------------------------|
| Empirical formula     | C <sub>30</sub> H <sub>22.50</sub> N <sub>6</sub> Cu <sub>2</sub><br>Mo <sub>8</sub> O <sub>26.25</sub> | C <sub>30</sub> H <sub>26</sub> N <sub>6</sub> Cu <sub>2</sub><br>Mo <sub>8</sub> O <sub>28</sub> | C <sub>11</sub> H <sub>11</sub> N <sub>5</sub> Cu<br>Mo <sub>3</sub> O <sub>11</sub> | C <sub>11</sub> H <sub>9</sub> N <sub>5</sub> Cu<br>Mo <sub>4</sub> O <sub>14</sub> |
| Formula weight        | 1781.64                                                                                                 | 1813.17                                                                                           | 740.61                                                                               | 882.53                                                                              |
| Crystal system        | Triclinic                                                                                               | Monoclinic                                                                                        | Triclinic                                                                            | Monoclinic                                                                          |
| Space group           | <i>P</i> <b>Error!</b>                                                                                  | <i>P</i> 2 <sub>1</sub> / <i>n</i>                                                                | <i>P</i> <b>Error!</b>                                                               | <i>P</i> 2 <sub>1</sub> / <i>c</i>                                                  |
| a(Å)                  | 12.531(5)                                                                                               | 12.0868(6)                                                                                        | 7.633(5)                                                                             | 9.638(5)                                                                            |
| b(Å)                  | 13.190(5)                                                                                               | 15.3515(7)                                                                                        | 10.979(5)                                                                            | 14.761(5)                                                                           |
| c(Å)                  | 13.589(5)                                                                                               | 12.4671(6)                                                                                        | 11.349(5)                                                                            | 15.417(5)                                                                           |
| α(°)                  | 77.378(5)                                                                                               | 90                                                                                                | 77.076(5)                                                                            | 90                                                                                  |
| β(°)                  | 89.683(5)                                                                                               | 102.5040(10)                                                                                      | 85.348(5)                                                                            | 104.889(5)                                                                          |
| γ(°)                  | 89.474(5)                                                                                               | 90                                                                                                | 74.767(5)                                                                            | 90                                                                                  |
| V(Å <sup>-3</sup> )   | 2191.7(15)                                                                                              | 2258.41 (19)                                                                                      | 894.2(8)                                                                             | 2119.7(15)                                                                          |
| Z                     | 2                                                                                                       | 2                                                                                                 | 2                                                                                    | 4                                                                                   |
| μ (mm <sup>-1</sup> ) | 3.257                                                                                                   | 3.166                                                                                             | 3.303                                                                                | 3.371                                                                               |
| F(000)                | 1697                                                                                                    | 1732                                                                                              | 710                                                                                  | 1676                                                                                |
| Limiting indices      | -14<= <i>h</i> <=14<br>-15<= <i>k</i> <=15<br>-16<= <i>l</i> <=14                                       | -11<= <i>h</i> <=16<br>-20<= <i>k</i> <=19<br>-15<= <i>l</i> <=16                                 | -10<= <i>h</i> <=10<br>-14<= <i>k</i> <=14<br>-15<= <i>l</i> <=15                    | -11<= <i>h</i> <=11<br>-17<= <i>k</i> <=17<br>-18<= <i>l</i> <=18                   |

|                                   |                                   |                                   |                                   |                                   |
|-----------------------------------|-----------------------------------|-----------------------------------|-----------------------------------|-----------------------------------|
| Reflections collected             | 14155/7632                        | 18370/5491                        | 12537/4425                        | 21593/ 3696                       |
| unique                            |                                   |                                   |                                   |                                   |
| R(int)                            | 0.0391                            | 0.0959                            | 0.0169                            | 0.0795                            |
| Data/restraints/param             | 7632/6/659                        | 5491/0/334                        | 4425/2 /286                       | 3696/24/316                       |
| eters                             |                                   |                                   |                                   |                                   |
| Goodness-of-fit on F <sup>2</sup> | 1.010                             | 1.066                             | 1.023                             | 1.079                             |
| Final R indices                   | $R_1 = 0.0357$<br>$wR_2 = 0.0878$ | $R_1 = 0.0701$<br>$wR_2 = 0.1209$ | $R_1 = 0.0241$<br>$wR_2 = 0.0615$ | $R_1 = 0.0710$<br>$wR_2 = 0.1537$ |
| [I>2sigma(I) ]                    |                                   |                                   |                                   |                                   |
| R indices (all data)              | $R_1 = 0.0486$<br>$wR_2 = 0.0947$ | $R_1 = 0.1175$<br>$wR_2 = 0.1365$ | $R_1 = 0.0252$<br>$wR_2 = 0.0621$ | $R_1 = 0.0914$<br>$wR_2 = 0.1652$ |

$${}^a R_1 = \frac{\sum \|F_o\| - \|F_c\|}{\sum \|F_o\|} \cdot {}^b wR_2 = \left[ \frac{\sum w(F_o^2 - F_c^2)^2}{\sum w(F_o^2)^2} \right]^{1/2}$$

**Table S2** Selected bond lengths (Å) and angles (°) for compound **1**

|               |          |               |          |
|---------------|----------|---------------|----------|
| Mo(1)-O(13)   | 1.682(4) | Mo(5)-O(21)   | 2.167(4) |
| Mo(1)-O(1)    | 1.748(4) | Mo(6)-O(16)   | 1.676(4) |
| Mo(1)-O(4)#1  | 1.857(4) | Mo(6)-O(15)   | 1.702(5) |
| Mo(1)-O(11)   | 2.006(4) | Mo(6)-O(23)#2 | 1.892(4) |
| Mo(1)-O(10)   | 2.275(4) | Mo(6)-O(17)   | 2.011(4) |
| Mo(1)-O(12)   | 2.290(4) | Mo(6)-O(18)   | 2.217(4) |
| Mo(2)-O(2)    | 1.696(4) | Mo(6)-O(20)#2 | 2.341(4) |
| Mo(2)-O(3)    | 1.751(4) | Mo(7)-O(19)   | 1.676(4) |
| Mo(2)-O(11)   | 1.948(4) | Mo(7)-O(20)   | 1.746(4) |
| Mo(2)-O(10)#1 | 1.951(4) | Mo(7)-O(18)   | 1.877(4) |
| Mo(2)-O(12)   | 2.113(4) | Mo(7)-O(21)   | 1.954(4) |
| Mo(2)-O(12)#1 | 2.390(4) | Mo(7)-O(17)   | 2.197(4) |
| Mo(3)-O(6)    | 1.685(4) | Mo(7)-O(18)#2 | 2.503(4) |
| Mo(3)-O(5)    | 1.687(4) | Mo(8)-O(26)   | 1.685(5) |
| Mo(3)-O(7)    | 1.910(4) | Mo(8)-O(25)   | 1.691(4) |
| Mo(3)-O(4)    | 1.973(4) | Mo(8)-O(23)   | 1.913(4) |
| Mo(3)-O(3)    | 2.261(4) | Mo(8)-O(24)   | 2.048(4) |
| Mo(3)-O(12)#1 | 2.478(4) | Mo(8)-O(21)   | 2.117(4) |
| Mo(4)-O(9)    | 1.687(5) | Cu(1)-N(1)    | 1.913(5) |
| Mo(4)-O(8)    | 1.691(5) | Cu(1)-O(14)   | 1.922(4) |
| Mo(4)-O(7)    | 1.894(4) | Cu(1)-N(3)    | 2.004(5) |
| Mo(4)-O(10)   | 2.021(4) | Cu(1)-N(2)    | 2.017(5) |
| Mo(4)-O(11)   | 2.329(4) | Cu(1)-O(15)   | 2.375(5) |
| Mo(4)-O(12)#1 | 2.373(4) | Cu(2)-N(5)    | 1.920(5) |
| Mo(5)-O(22)   | 1.682(5) | Cu(2)-O(1)    | 1.933(4) |
| Mo(5)-O(14)   | 1.741(4) | Cu(2)-N(4)    | 2.006(5) |

|                  |          |                 |          |
|------------------|----------|-----------------|----------|
| Mo(5)-O(24)      | 1.834(4) | Cu(2)-N(6)      | 2.040(5) |
| Mo(5)-O(17)      | 1.915(4) | C(1)-N(3)       | 1.335(8) |
| N(1)-Cu(1)-O(14) | 178.2(2) | C(5)-C(6)       | 1.471(8) |
| N(1)-Cu(1)-N(3)  | 80.9(2)  | O(2)-Mo(2)-O(3) | 103.7(2) |
| N(1)-Cu(1)-N(2)  | 100.8(2) | C(3)-C(2)-C(1)  | 118.3(7) |
| O(14)-Cu(1)-N(3) | 81.0(2)  | N(3)-C(1)-C(2)  | 122.3(7) |

Symmetry transformations used to generate equivalent atoms: #1 -x-1,-y,-z+2; #2 -x,-y+1,-z+1.

**Table S3** Selected bond lengths (Å) and angles (°) for compound **2**

|                  |          |                  |           |
|------------------|----------|------------------|-----------|
| Mo(1)-O(3)       | 1.694(7) | Mo(3)-O(4)#1     | 2.334(6)  |
| Mo(1)-O(12)      | 1.696(6) | Mo(3)-O(2)       | 2.372(6)  |
| Mo(1)-O(6)       | 1.933(7) | Mo(4)-O(5)       | 1.695(6)  |
| Mo(1)-O(4)       | 1.998(6) | Mo(4)-O(10)      | 1.763(6)  |
| Mo(1)-O(2)       | 2.318(6) | Mo(4)-O(11)      | 1.942(6)  |
| Mo(1)-O(11)#1    | 2.326(6) | Mo(4)-O(4)       | 1.957(5)  |
| Mo(2)-O(13)      | 1.683(8) | Mo(4)-O(2)       | 2.136(6)  |
| Mo(2)-O(1)       | 1.714(7) | Mo(4)-O(2)#1     | 2.343(6)  |
| Mo(2)-O(9)       | 1.909(6) | Cu(1)-N(2)       | 1.932(8)  |
| Mo(2)-O(6)       | 1.948(6) | Cu(1)-O(1W)      | 1.969(7)  |
| Mo(2)-O(10)#1    | 2.277(6) | Cu(1)-N(3)       | 2.015(8)  |
| Mo(2)-O(2)       | 2.421(6) | Cu(1)-N(1)       | 2.021(8)  |
| Mo(3)-O(7)       | 1.696(7) | Cu(1)-O(1)       | 2.227(6)  |
| Mo(3)-O(8)       | 1.701(7) | N(2)-C(2)        | 1.329(13) |
| Mo(3)-O(9)       | 1.895(7) | N(2)-C(4)        | 1.333(14) |
| Mo(3)-O(11)      | 1.990(6) | C(1)-C(13)       | 1.385(14) |
| O(3)-Mo(1)-O(12) | 105.1(4) | N(2)-Cu(1)-N(3)  | 80.2(4)   |
| O(3)-Mo(1)-O(6)  | 100.8(3) | O(1W)-Cu(1)-N(3) | 97.1(3)   |
| O(3)-Mo(1)-O(4)  | 98.3(3)  | N(2)-Cu(1)-N(1)  | 80.3(3)   |
| O(12)-Mo(1)-O(4) | 102.2(3) | N(3)-C(3)-C(15)  | 124.3(11) |
| N(2)-Cu(1)-O(1W) | 171.3(3) | N(2)-C(2)-C(12)  | 119.6(11) |

Symmetry transformations used to generate equivalent atoms: #1 -x+2,-y,-z+1.

**Table S4** Selected bond lengths (Å) and angles (°) for compound **3**

|              |          |             |          |
|--------------|----------|-------------|----------|
| Mo(1)-O(5)   | 1.701(3) | Mo(3)-O(9)  | 1.704(3) |
| Mo(1)-O(4)#1 | 1.766(3) | Mo(3)-O(10) | 1.726(3) |
| Mo(1)-O(7)#2 | 1.880(3) | Mo(3)-O(1)  | 1.926(3) |
| Mo(1)-O(3)   | 2.027(3) | Mo(3)-O(6)  | 1.962(3) |
| Mo(1)-O(6)   | 2.078(2) | Mo(3)-O(3)  | 2.202(3) |
| Mo(1)-O(6)#2 | 2.282(3) | Mo(3)-O(7)  | 2.280(3) |
| Mo(2)-O(2)   | 1.705(3) | Cu(1)-O(1)  | 1.893(3) |
| Mo(2)-O(8)   | 1.728(3) | Cu(1)-N(3)  | 1.948(3) |
| Mo(2)-O(3)#1 | 1.912(3) | Cu(1)-N(2)  | 1.987(3) |
| Mo(2)-O(7)   | 2.033(3) | Cu(1)-N(1)  | 2.013(3) |
| Mo(2)-O(1)   | 2.196(3) | Cu(1)-O(2)  | 2.347(3) |
| Mo(2)-O(1)#1 | 2.220(3) | C(1)-N(3)   | 1.331(5) |

|                   |            |                 |            |
|-------------------|------------|-----------------|------------|
| O(3)-Mo(1)-O(6)#2 | 85.36(9)   | O(1)-Cu(1)-N(2) | 97.20(13)  |
| O(6)-Mo(1)-O(6)#2 | 74.03(10)  | N(3)-Cu(1)-N(2) | 79.06(14)  |
| O(2)-Mo(2)-O(8)   | 103.94(14) | O(1)-Cu(1)-N(1) | 101.99(13) |
| O(2)-Mo(2)-O(3)#1 | 100.94(12) | C(3)-C(5)-C(6)  | 117.2(4)   |
| O(4)-Cu(1)-N(3)   | 166.20(12) | N(3)-C(6)-C(5)  | 121.5(4)   |

Symmetry transformations used to generate equivalent atoms: #1-x-1,-y+1,-z+1; #2 -x, -y+1,-z+1.

**Table S5** Selected bond lengths (Å) and angles (°) for compound 4

|                  |           |                  |           |
|------------------|-----------|------------------|-----------|
| Mo(1)-O(5)       | 1.682(15) | Mo(3)-O(12)#     | 1.929(13) |
| Mo(1)-O(2)       | 1.769(14) | Mo(3)-O(2)       | 2.267(15) |
| Mo(1)-O(10)      | 1.927(14) | Mo(3)-O(7)#1     | 2.479(15) |
| Mo(1)-O(6)       | 1.962(14) | Mo(4)-O(11)      | 1.711(16) |
| Mo(1)-O(7)       | 2.128(15) | Mo(4)-O(3)       | 1.713(15) |
| Mo(1)-O(7)#1     | 2.354(14) | Mo(4)-O(12)      | 1.879(13) |
| Mo(1)-Mo(2)      | 3.201(3)  | Mo(4)-O(10)      | 2.011(12) |
| Mo(2)-O(4)       | 1.695(16) | Mo(4)-O(6)#1     | 2.283(14) |
| Mo(2)-O(8)       | 1.712(16) | Mo(4)-O(7)       | 2.379(14) |
| Mo(2)-O(13)      | 1.900(14) | Cu(1)-O(1W)      | 1.949(15) |
| Mo(2)-O(6)       | 1.989(14) | Cu(1)-N(1)       | 1.951(16) |
| Mo(2)-O(7)       | 2.277(14) | Cu(1)-N(3)       | 1.99(2)   |
| Mo(2)-O(10)#     | 2.327(14) | Cu(1)-N(2)       | 2.019(19) |
| Mo(3)-O(1)       | 1.718(15) | Cu(1)-O(1)       | 2.341(16) |
| Mo(3)-O(9)       | 1.719(16) | C(1)-C(5)        | 1.37(3)   |
| Mo(3)-O(13)#     | 1.914(14) | C(1)-N(2)        | 1.38(2)   |
| O(1W)-Cu(1)-N(1) | 169.0(7)  | O(2)-Mo(1)-O(10) | 96.0(6)   |
| O(1W)-Cu(1)-N(3) | 104.8(7)  | O(5)-Mo(1)-O(6)  | 99.5(7)   |
| N(1)-Cu(1)-N(3)  | 78.9(8)   | C(5)-C(1)-C(2)   | 131.4(19) |
| O(1W)-Cu(1)-N(2) | 97.2(7)   | N(2)-C(1)-C(2)   | 117.9(17) |
| N(1)-Cu(1)-N(2)  | 79.3(7)   | C(2)-C(8)-C(9)   | 117(3)    |

Symmetry transformations used to generate equivalent atoms: #1 -x+1,-y+1,-z+2.

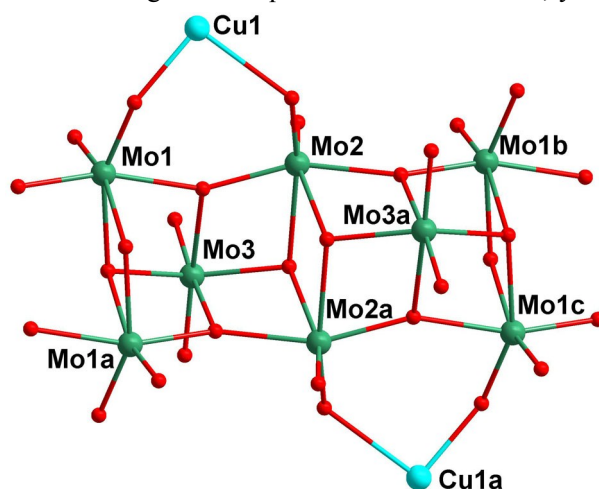

**Fig. S1** The environments of three molybdenum atoms in compound 3.

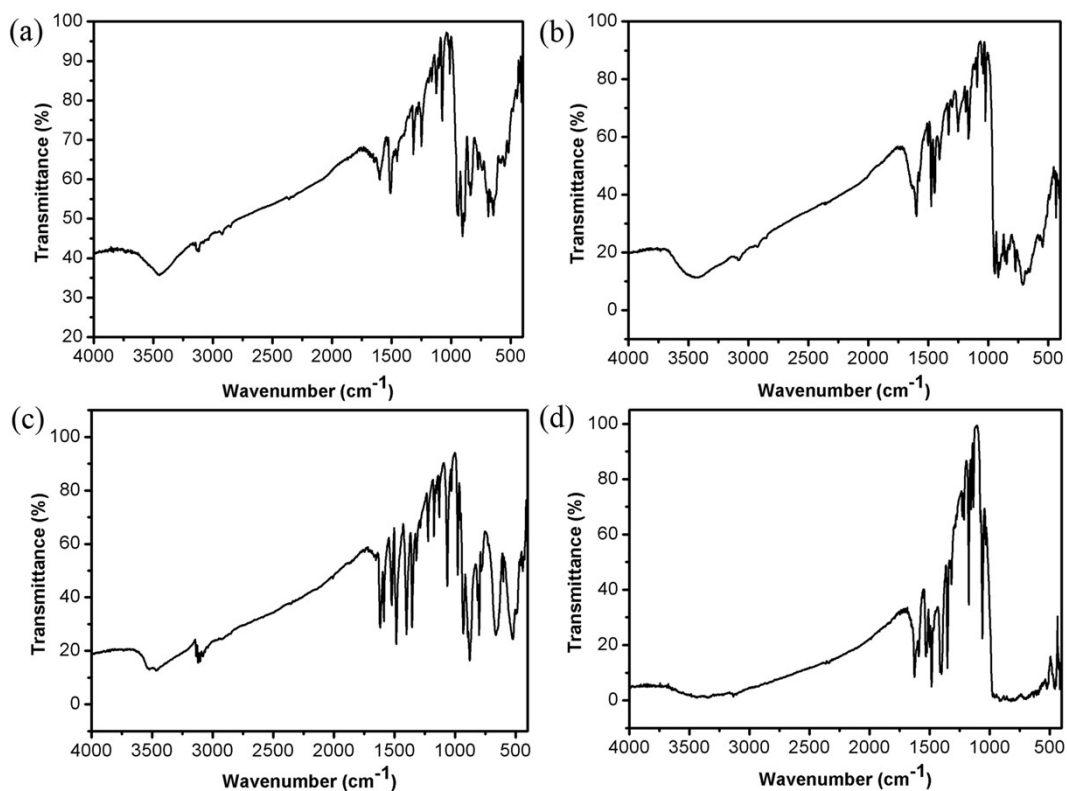

Fig. S2 IR spectra obtained from compounds 1-4.

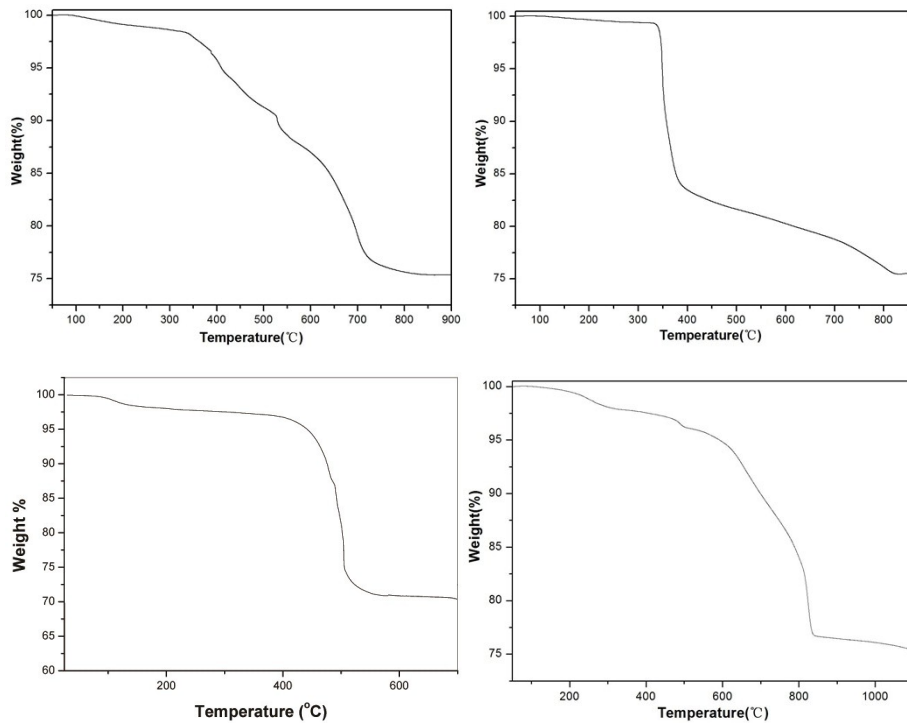

Fig. S3 TG curve obtained from compounds 1-4.

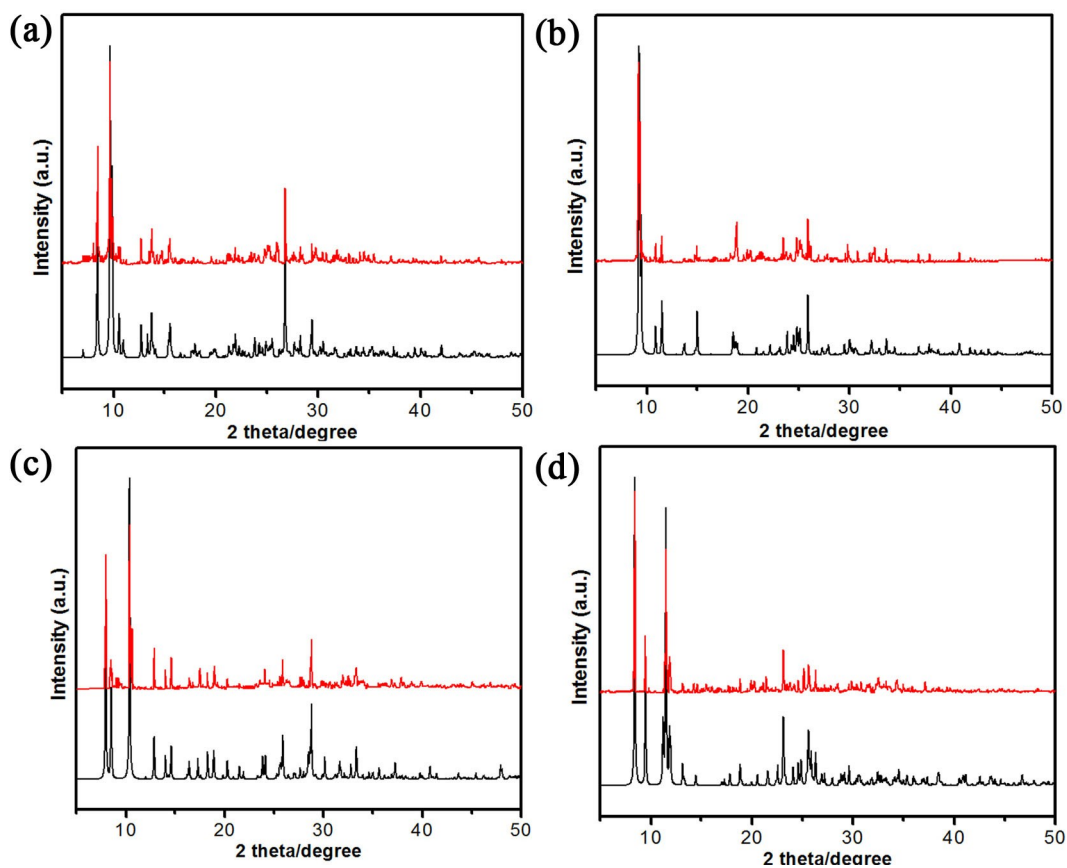

**Fig. S4** The experimental (red line) and simulated (black line) PXRD patterns obtained from compounds 1-4.

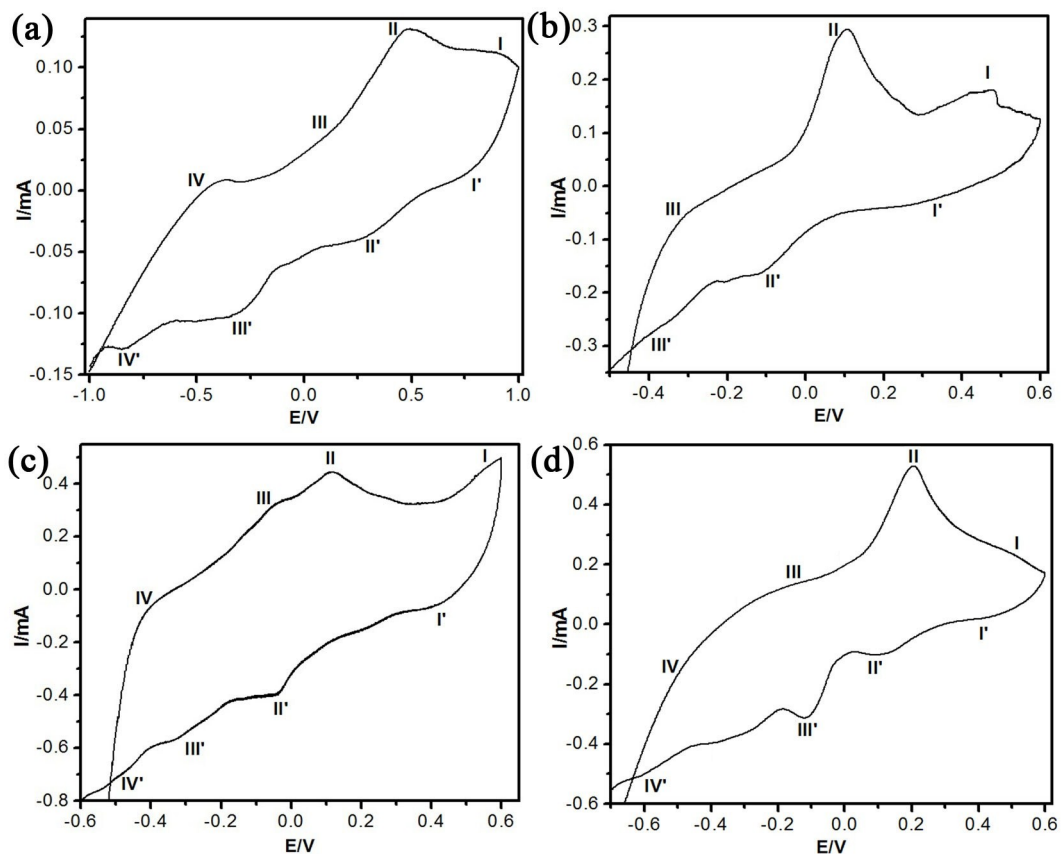

**Fig. S5** The cyclic voltammograms of *n*-CPEs (*n* = 1-4) in H<sub>2</sub>SO<sub>4</sub> + Na<sub>2</sub>SO<sub>4</sub> solutions at a scan rate of 0.1 V s<sup>-1</sup>.

It is known that oxidation of ascorbic acid undergoes a two-proton dehydrogenation process:

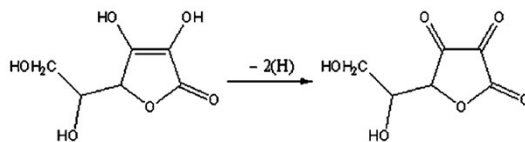

**Table S6** CAT% data of 1-4-CPEs toward reduction of nitrite

| substrate | CAT%                 | 1-CPE | 2-CPE | 3-CPE | 4-CPE |
|-----------|----------------------|-------|-------|-------|-------|
| Nitrite   | $2 \times 10^{-3}$ M | 79    | 359   | 392   | 232   |
|           | $4 \times 10^{-3}$ M | 99    | 400   | 547   | 920   |
|           | $6 \times 10^{-3}$ M | 161   | 616   | 1012  | 1229  |
|           | $8 \times 10^{-3}$ M | 244   | 1721  | 1093  | 1467  |

**Table S7** CAT% data of 1-4-CPEs toward oxidation of AA

| substrate | CAT%                 | 1-CPE | 2-CPE | 3-CPE-Cu <sup>II</sup> | 3-CPE-Mo <sup>VI</sup> | 4-CPE |
|-----------|----------------------|-------|-------|------------------------|------------------------|-------|
| AA        | $2 \times 10^{-3}$ M | 31    | 28    | 26                     | 29                     | 10    |
|           | $4 \times 10^{-3}$ M | 48    | 44    | 61                     | 58                     | 23    |
|           | $6 \times 10^{-3}$ M | 51    | 61    | 87                     | 90                     | 40    |
|           | $8 \times 10^{-3}$ M | 58    | 83    | 96                     | 123                    | 60    |

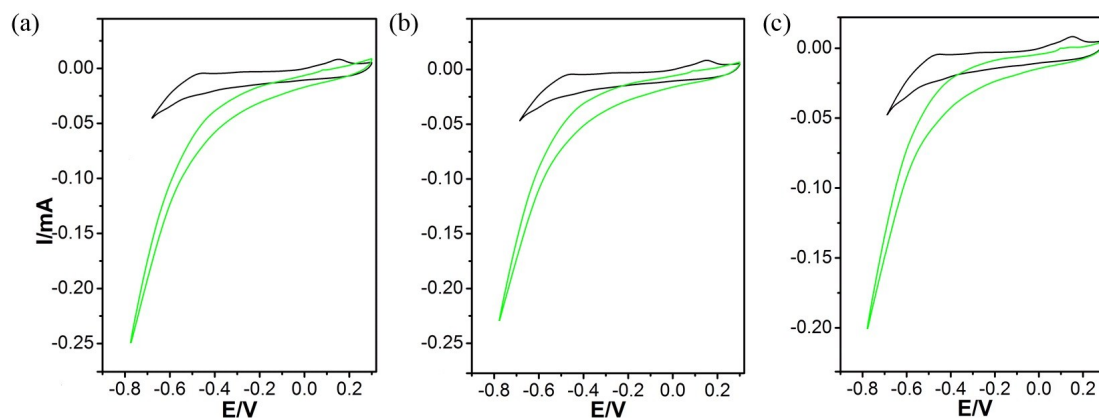

**Fig. S6** Cyclic voltammograms showing the electrocatalytic reduction of NO<sub>2</sub><sup>-</sup> (2 × 10<sup>-3</sup> mol L<sup>-1</sup>) by 2-CPE in 1M H<sub>2</sub>SO<sub>4</sub> + Na<sub>2</sub>SO<sub>4</sub> solutions (pH = 1). Scan rate: 0.1 V·s<sup>-1</sup>.
